# Supplementary material for: Haematological, Biochemical and Hormonal Biomarkers of Heat Intolerance in Military Personnel
Source: MDPI journal article supplement (doi:10.3390/biology10101068), 2021-10-19
Supplement: s1 [file s1]

**Table S1: Anthropometric characteristics and physiological responses of the heat tolerant and heat intolerant participants.**

| Characteristics                                 | Heat Tolerant | Heat Intolerant | p-Value |
|-------------------------------------------------|---------------|-----------------|---------|
| Weight (kg) *                                   | 75.5 ± 12.10  | 85.3 ± 12.8     | 0.007   |
| BMI (kg/m <sup>2</sup> ) *                      | 24.4 ± 3.3    | 27.0 ± 3.9      | 0.011   |
| BSA (m <sup>2</sup> ) *                         | 1.9 ± 0.2     | 2.0 ± 0.2       | 0.017   |
| BSA/M <sub>ratio</sub> (cm <sup>-2</sup> /kg) * | 256.5 ± 20.0  | 240.4 ± 19.5    | 0.005   |
| VO <sub>2</sub> max (mL/kg/min) *               | 48.2 ± 10.5   | 39.2 ± 6.4      | 0.001   |
| Body fat (%) *                                  | 20.2 ± 5.9    | 24.1 ± 7.0      | 0.034   |
| Baseline T <sub>c</sub> (°C) *                  | 36.87 ± 0.29  | 37.02 ± 0.29    | 0.076   |
| Final T <sub>c</sub> (°C) *                     | 37.96 ± 0.37  | 38.67 ± 0.22    | <0.001  |
| Baseline HR (bpm) *                             | 65 ± 11       | 70 ± 10         | 0.109   |
| Final HR (bpm) *                                | 122 ± 18      | 154 ± 15        | <0.001  |
| Final RPE †                                     | 11.00 (3.0)   | 13 (6.0)        | 0.016   |
| SR (L/hr) †                                     | 1.18 (0.28)   | 1.32 (0.80)     | 0.399   |
| %BM loss (kg) †                                 | 1.38 ± 0.82   | 1.53 ± 1.59     | 0.645   |

BMI, body mass index; BSA/M ratio, body surface area to mass ratio; † Mann Whitney U test was used (medians and interquartile range of the raw data are reported); \*Independent samples t-test was used (mean and SD of the raw data are reported). The table was adapted and reprinted from Alele et al [10]

10. Alele, F.O.; Malau-Aduli, B.S.; Malau-Aduli, A.E.O.; Crowe, M.J. Individual Anthropometric, Aerobic Capacity and Demographic Characteristics as Predictors of Heat Intolerance in Military Populations. *Medicina* **2021**, *57*, 173.

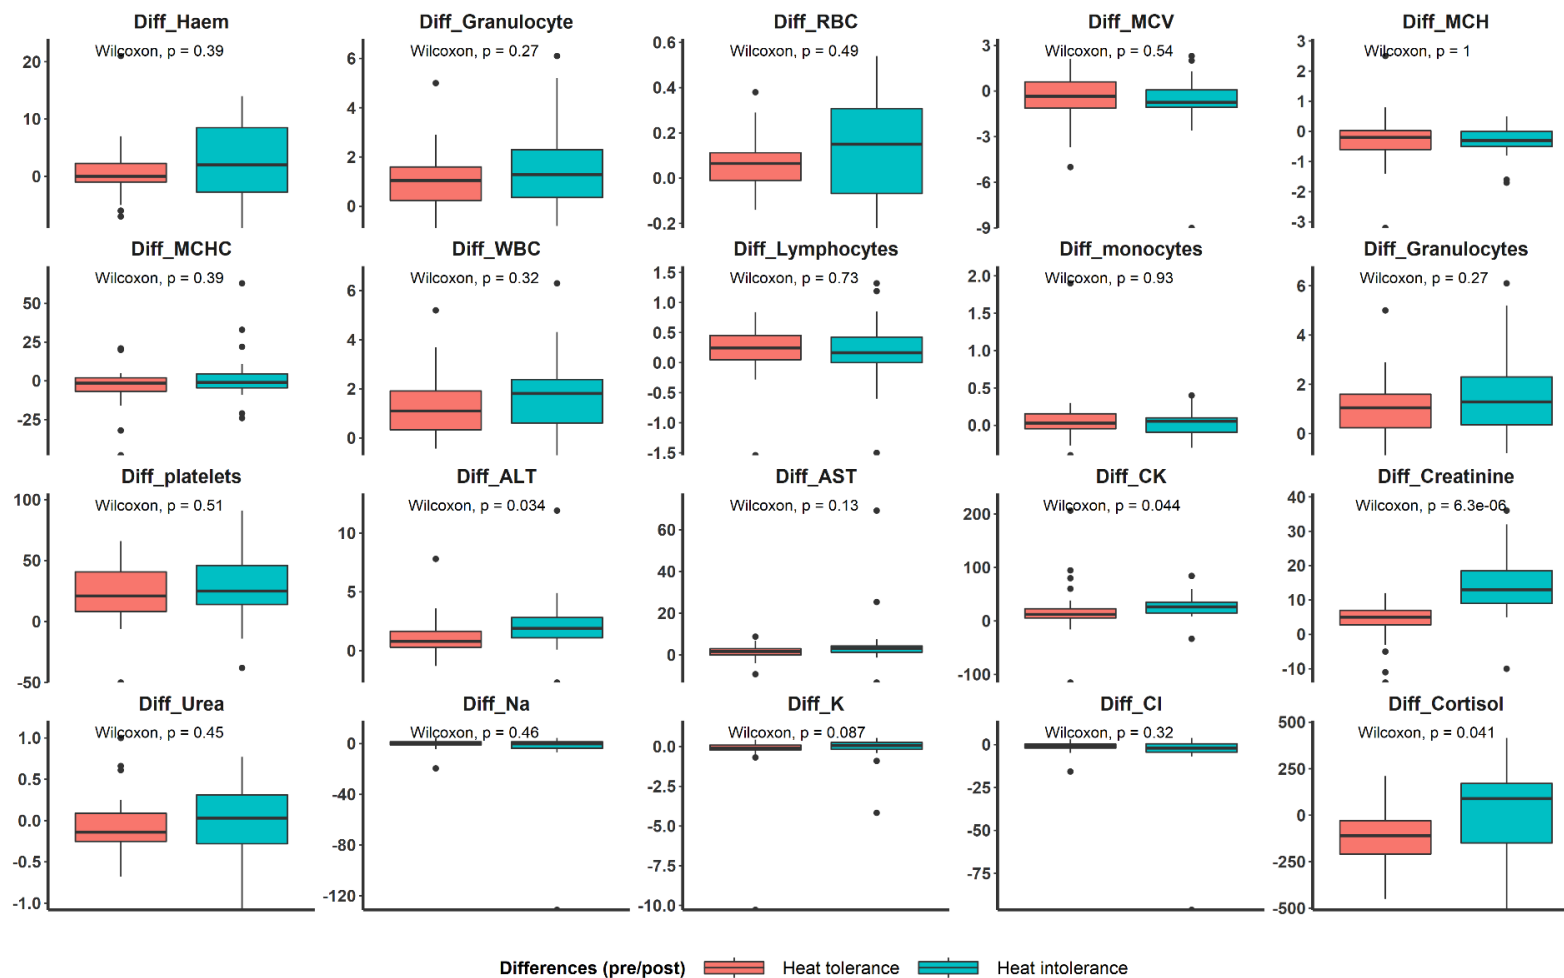

WBC: White blood cell; RBC: Red blood cell; MCV: Mean corpuscular volume; MCH: Mean corpuscular haemoglobin; MCHC: Mean corpuscular haemoglobin concentration; CK: creatine kinase; ALT: alanine transaminase; AST: aspartate transaminase; K: Potassium, Na: Sodium; Cl: Chloride

Figure S1: Haematological and biochemical differences between the time points of the heat tolerance test and the heat tolerant and intolerant participants

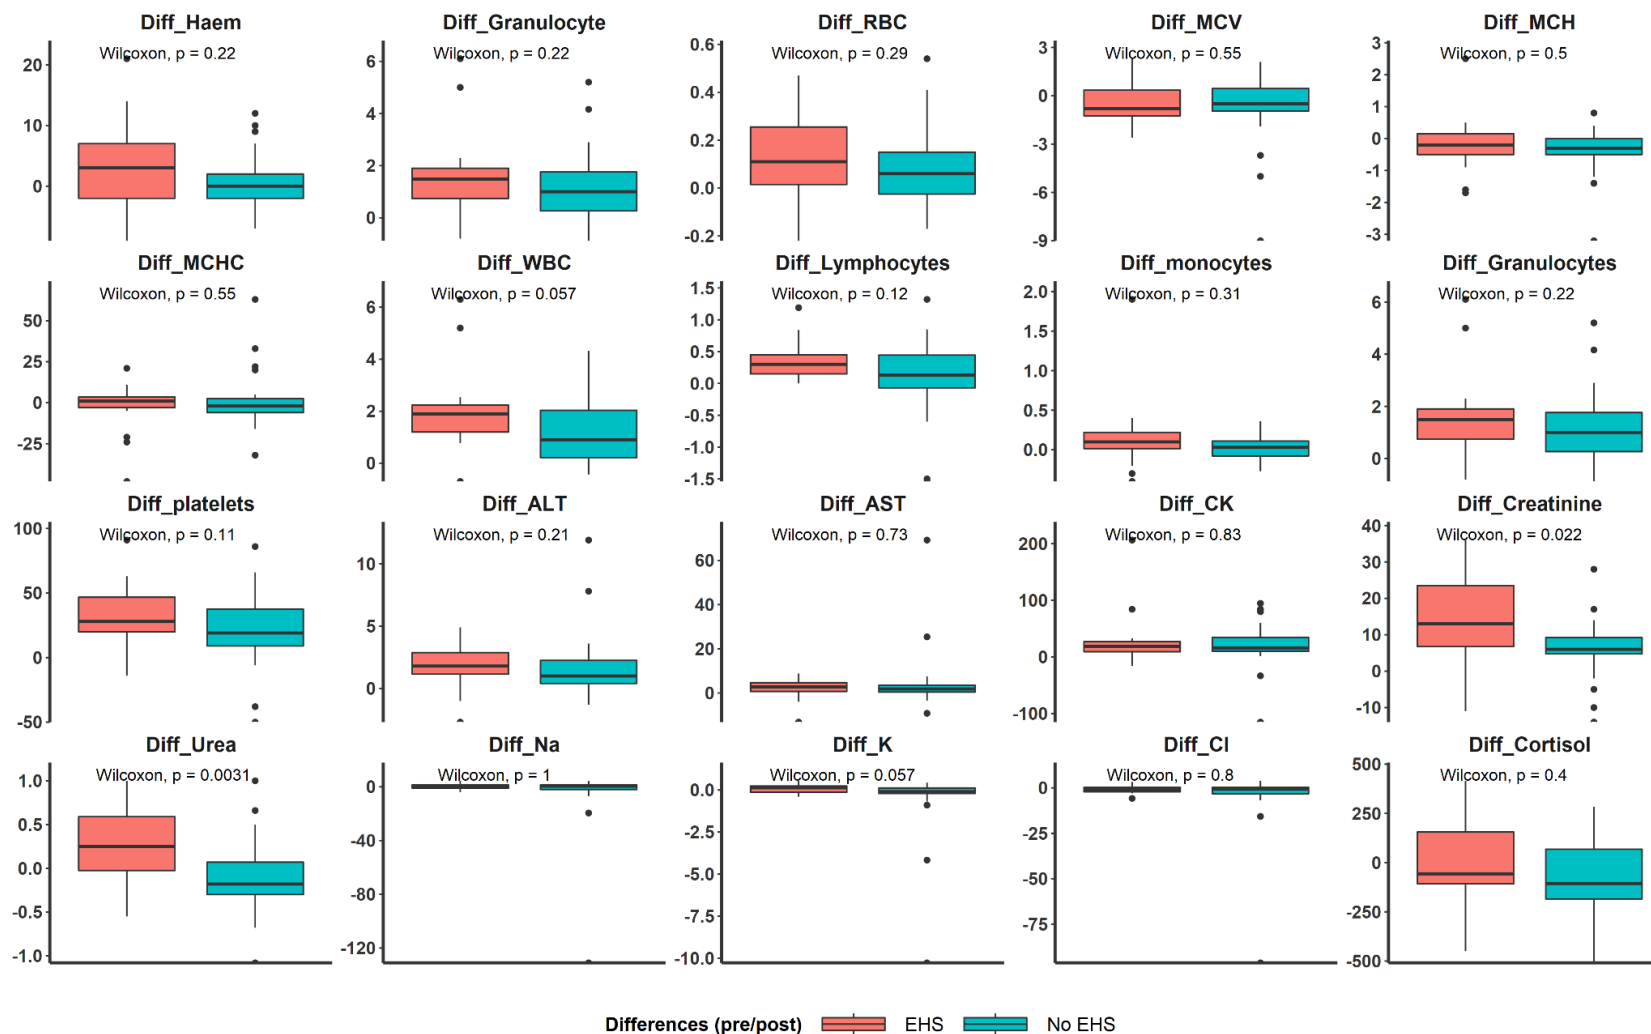

WBC: White blood cell; RBC: Red blood cell; MCV: Mean corpuscular volume; MCH: Mean corpuscular haemoglobin; MCHC: Mean corpuscular haemoglobin concentration; CK: creatine kinase; ALT: alanine transaminase; AST: aspartate transaminase; K: Potassium, Na: Sodium; Cl: Chloride

Figure S2: Haematological and biochemical differences between the time points of the heat tolerance test and the participants with and without a history of EHS
